# Supplementary material for: Synthesis of a cationic ruthenium(ii) complex and its non-enzymatic glucose-sensing properties
Source: Royal Society of Chemistry journal article supplement (doi:10.1039/d2nj05470a), 2023-01-01
Supplement: d2nj05470a1.pdf [file d2nj05470a1.pdf]

## ***Synthesis of Cationic Ruthenium(II) complex and non-enzymatic Glucose Sensor Properties***

**Serkan DAYAN<sup>a\*</sup>, Namık Özdemir<sup>b</sup>, Diğdem ERDENER<sup>c</sup>, Osman DAYAN<sup>c\*</sup>,  
Bekir ÇETINKAYA<sup>d</sup>**

<sup>a</sup> *Drug Application and Research Center, Erciyes University, 38039 Kayseri, Turkey*

<sup>b</sup> *Department of Mathematics and Science Education, Faculty of Education,  
Ondokuz Mayıs University, 55139 Samsun, Turkey*

<sup>c</sup> *Department of Chemistry, Faculty of Arts and Science, Çanakkale Onsekiz Mart University,  
17100, Çanakkale, Turkey*

<sup>d</sup> *Department of Chemistry, Ege University, 35100, Bornova, İzmir, Turkey*

### **Contents of the supporting information file:**

- Figure-S1. FT-IR spectra of 2
- Figure-S2. <sup>1</sup>H-NMR spectra of 2
- Figure-S3. ESI-MS spectra of 2
- Figure-S4. UV-vis spectra of 2
- Figure-S5. CV voltammogram of 2
- Figure-S6. TG curve of 2
- Figure-S7. The cross-sectional analysis of the Ru(II)-RGO-TiO<sub>2</sub>@FTO working electrode
- Figure-S8. The SEM-EDX mapping analysis of the Ru(II)-RGO-TiO<sub>2</sub>@FTO working electrode

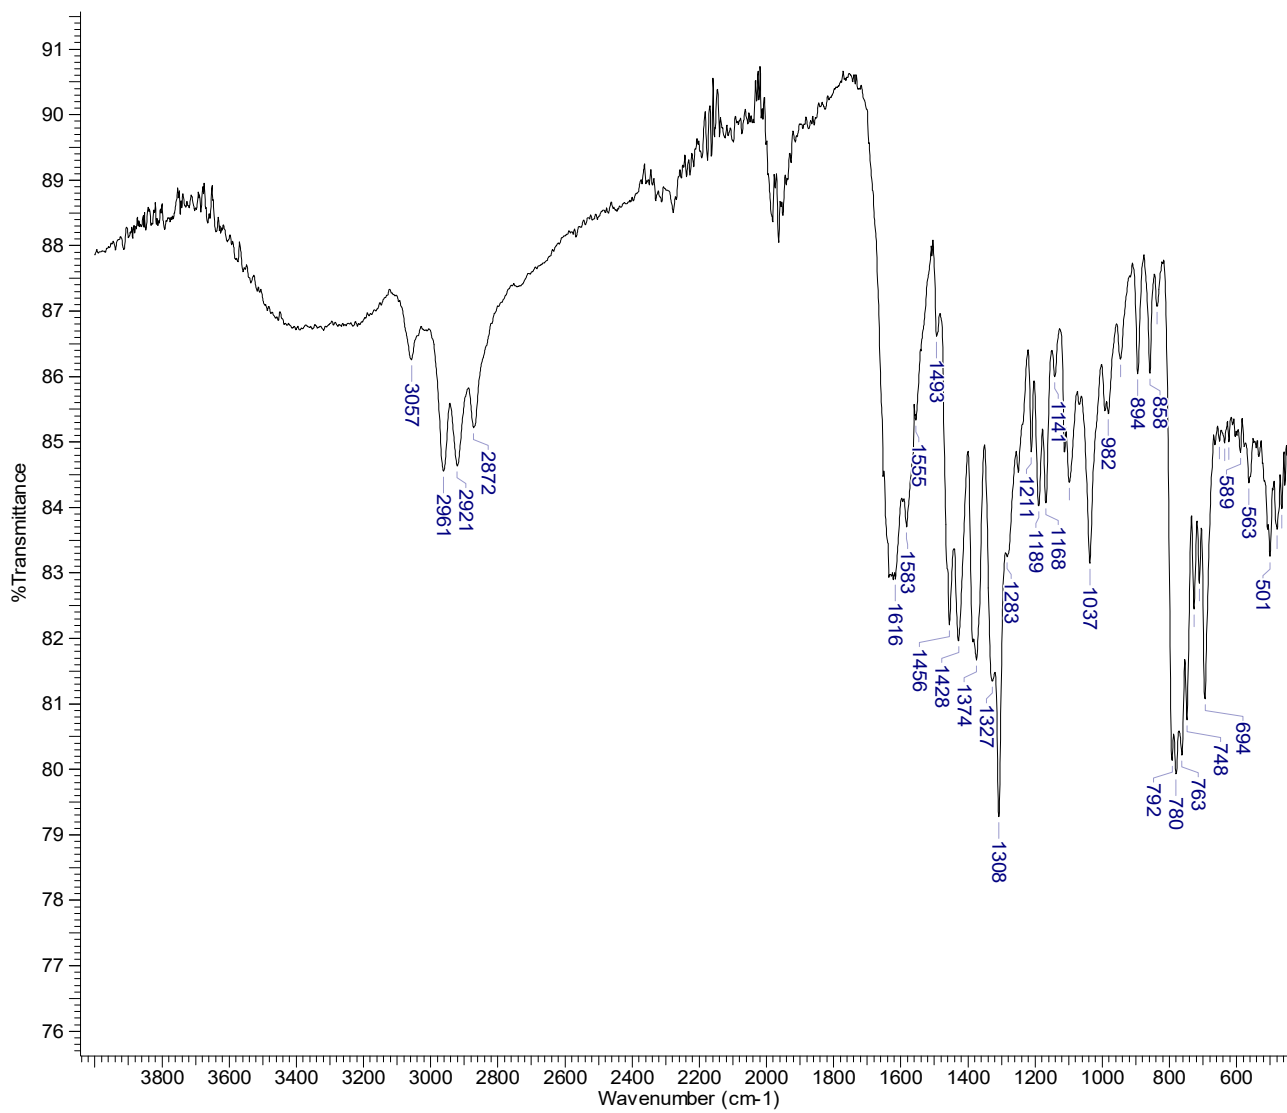

**Figure-S1.** FT-IR spectra of **2**

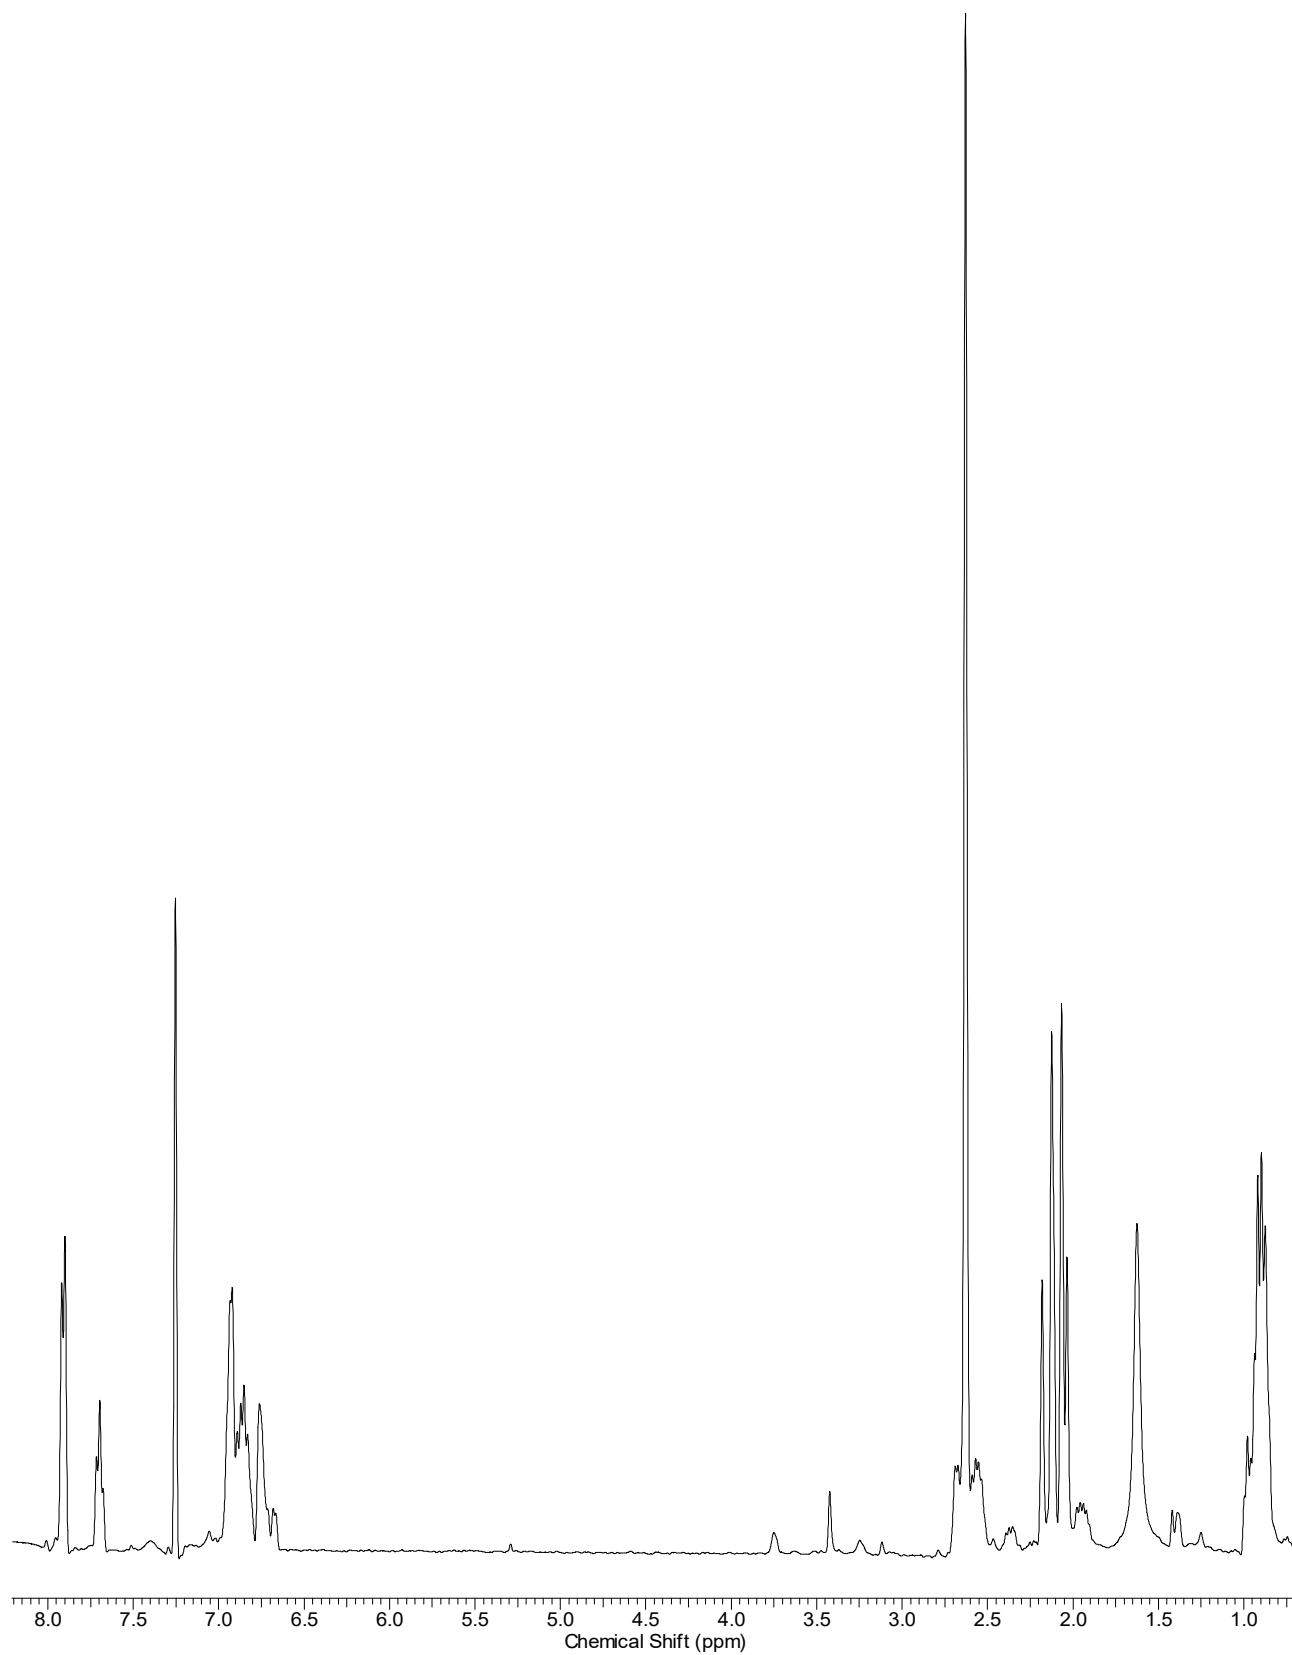

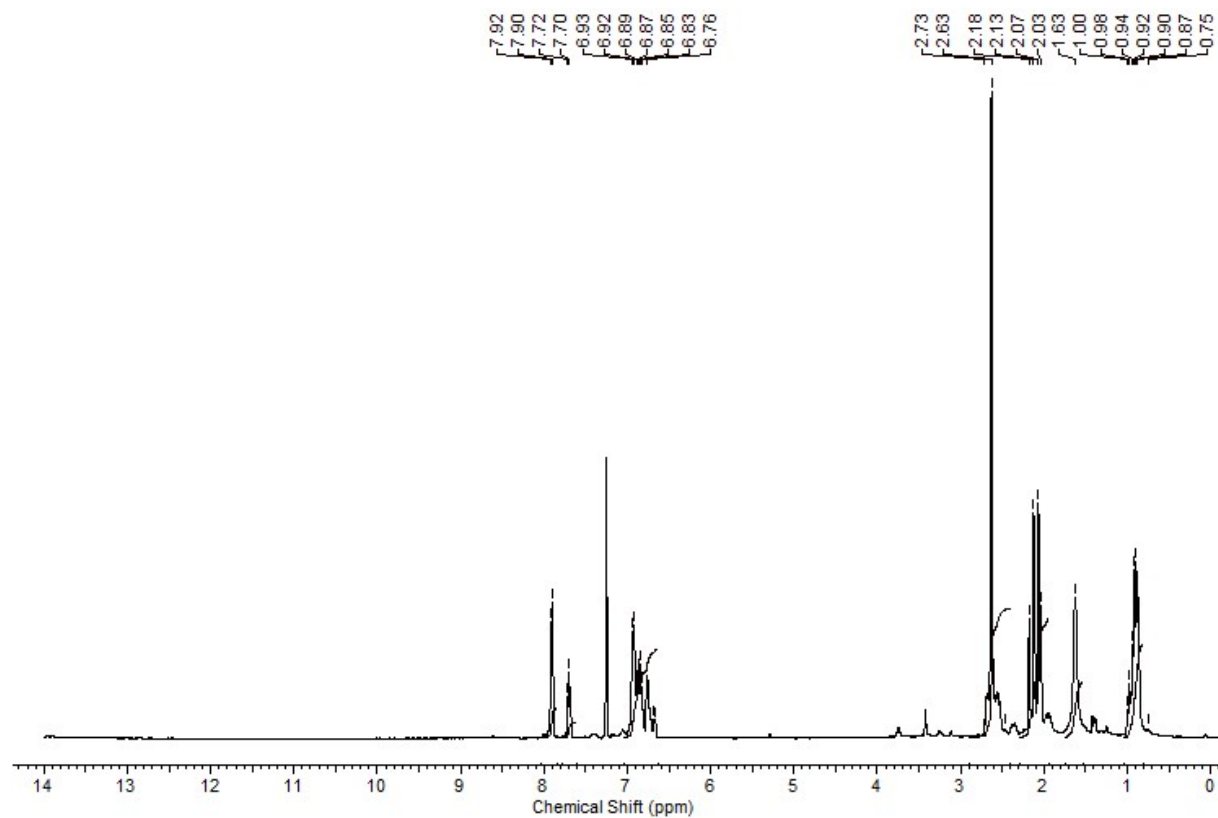

**Figure-S2.** <sup>1</sup>H-NMR spectra of **2**

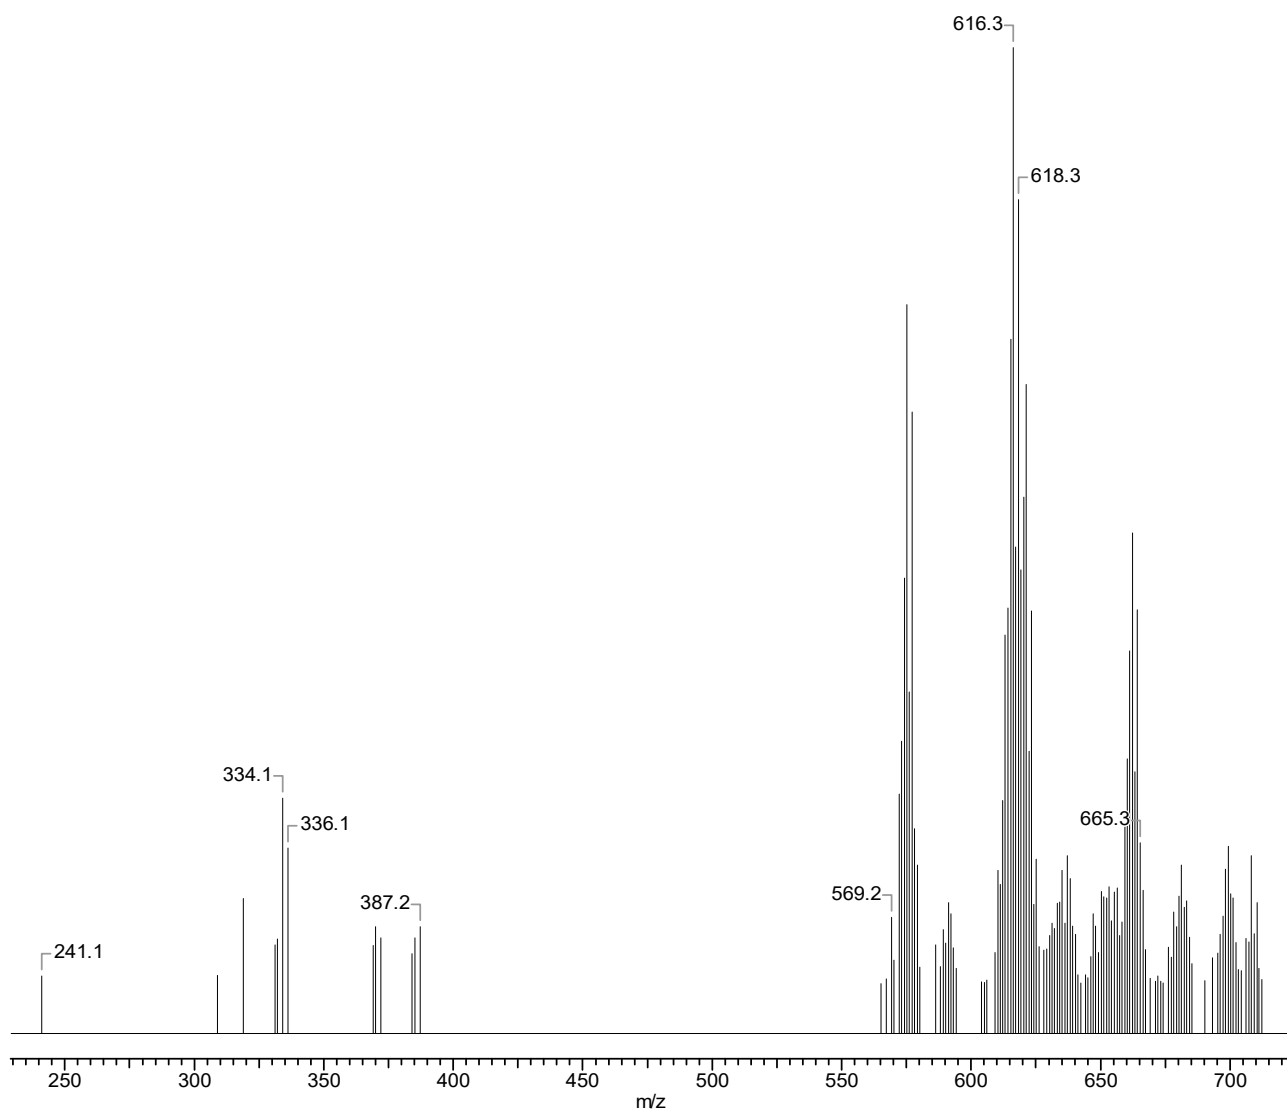

**Figure-S3.** ESI-MS spectra of **2**

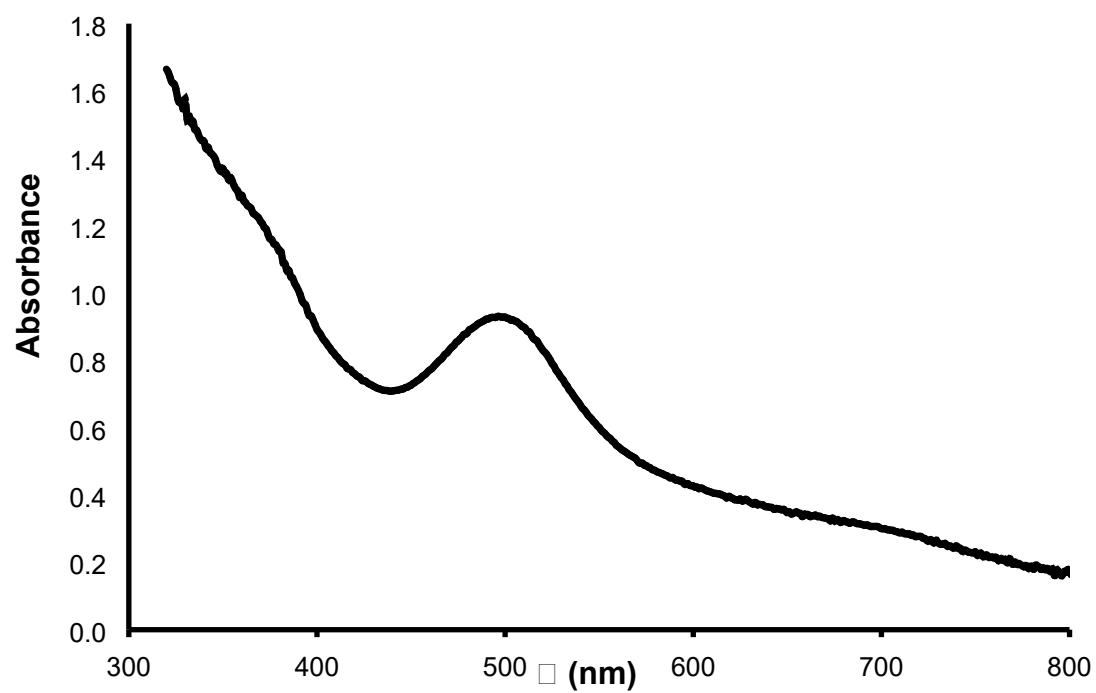

Figure-S4. UV-Visible spectrum of 2

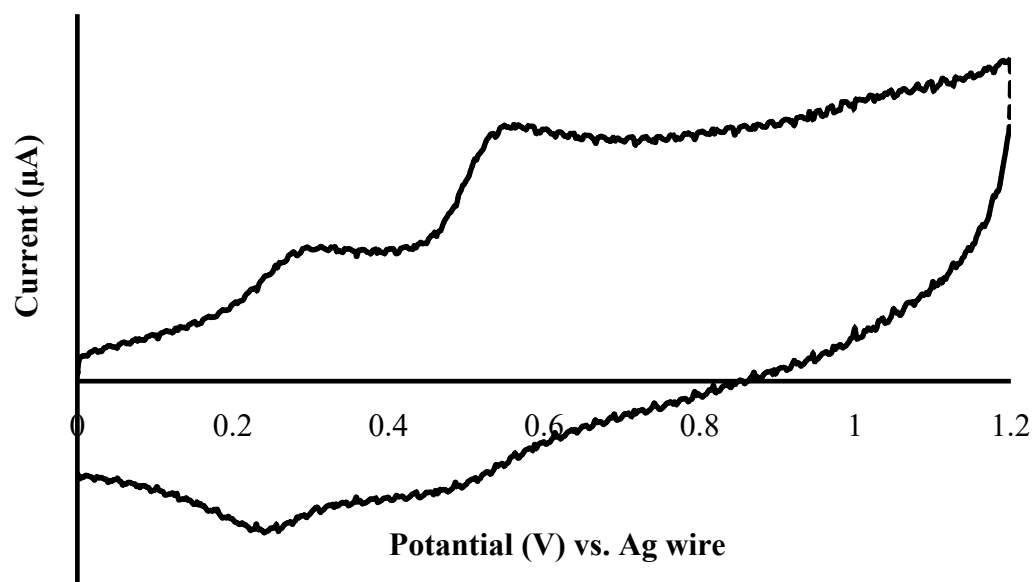

Figure-S5. CV voltammogram of 2

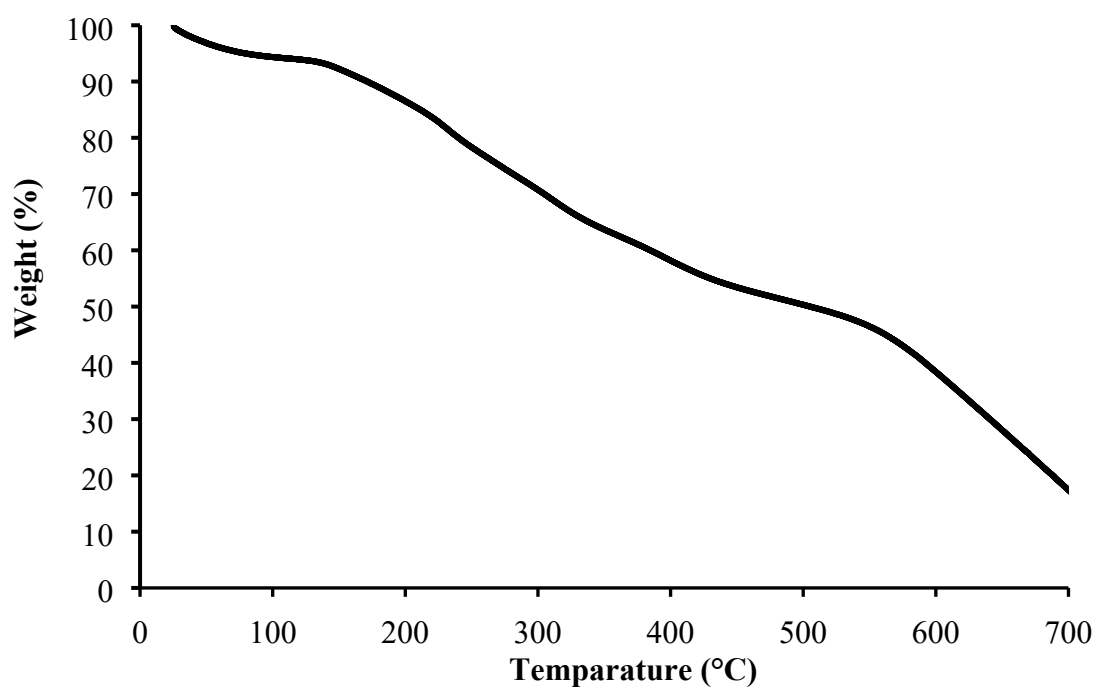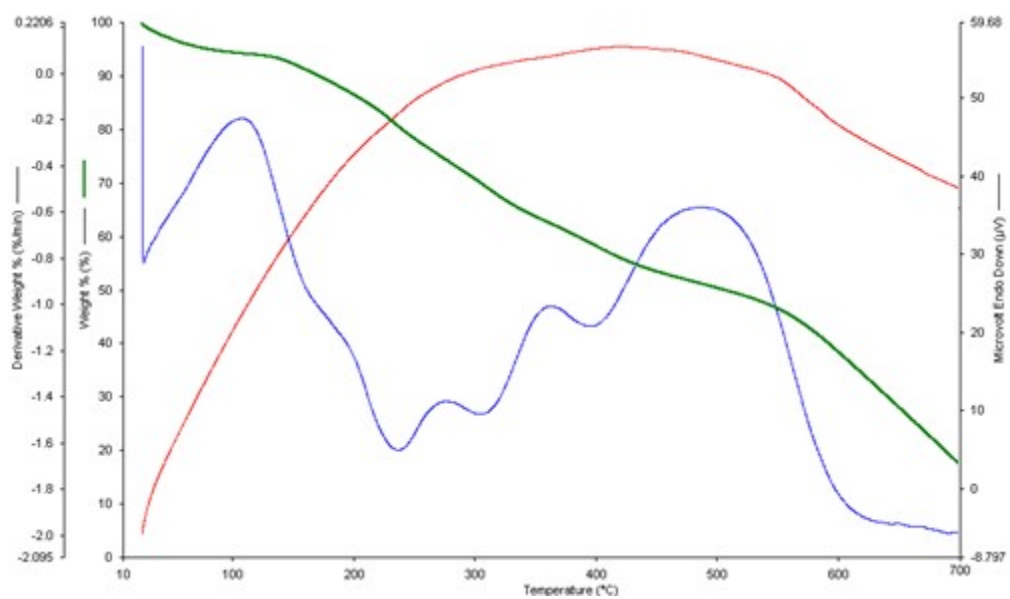

Figure-S6. TG curve of 2

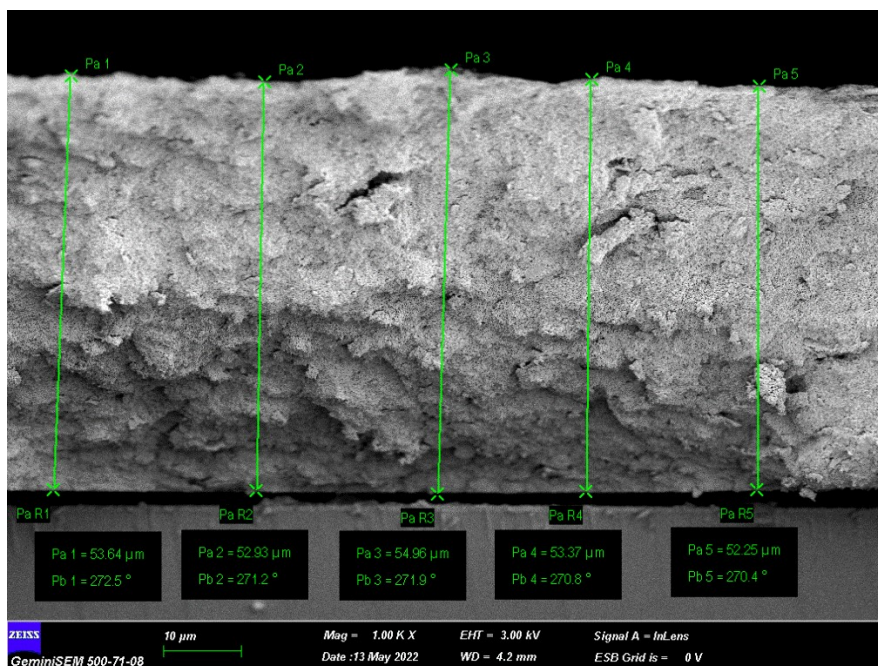

**Figure-S7.** The cross-sectional analysis of the Ru(II)-RGO-TiO<sub>2</sub>@FTO working electrode

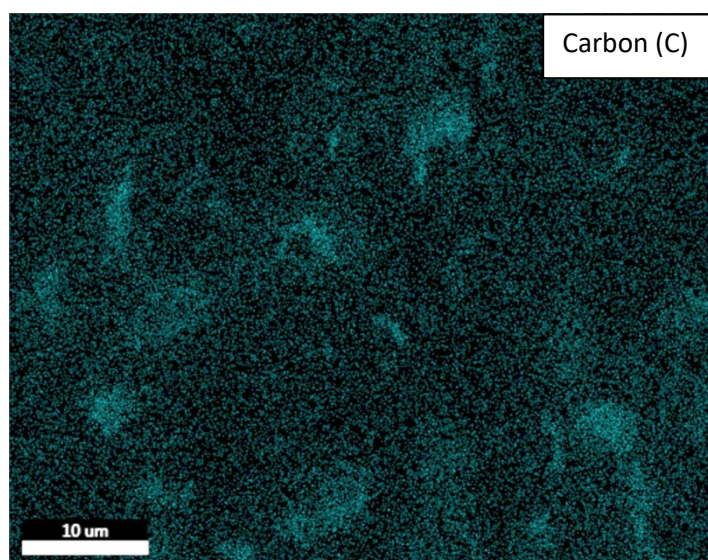



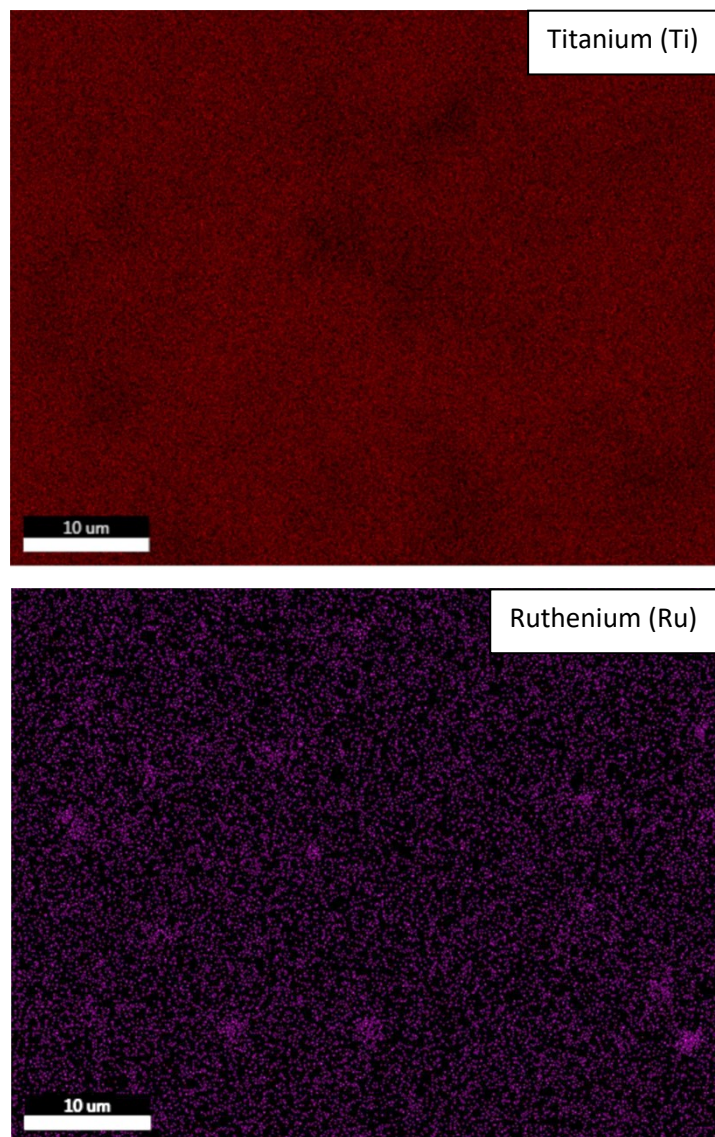

**Figure-S8.** The SEM-EDX mapping analysis of the Ru(II)-RGO-TiO<sub>2</sub>@FTO working electrode
